# Supplementary material
Source: MDPI journal article supplement (https://www.mdpi.com/2071-1050/13/6/3453)
Supplement: s1 [file s1]

**Table S1.** Overview of selected papers.

| Author             | Year | Title                                                                                                                           | Journal                                         | Data base                                  | Business model and organization management | Food loss and waste in the supply chain | Analytical tools for the CE | Stakeholder acceptance of the CE | Mitigation strategies and political approach |
|--------------------|------|---------------------------------------------------------------------------------------------------------------------------------|-------------------------------------------------|--------------------------------------------|--------------------------------------------|-----------------------------------------|-----------------------------|----------------------------------|----------------------------------------------|
| Atinkut et al.     | 2020 | Farmers' willingness-to-pay for eco-friendly agricultural waste management in Ethiopia: A contingent valuation                  | Journal of Cleaner Production                   | Science direct                             |                                            |                                         |                             | X                                |                                              |
| Barth et al        | 2017 | Towards a conceptual framework of sustainable business model innovation in the agri-food sector: A systematic literature review | Sustainability                                  | Web of Science                             | X                                          |                                         |                             |                                  |                                              |
| Bas-Bellver et al. | 2020 | Turning Agri-Food Cooperative Vegetable Residues into Functional Powdered Ingredients for the Food Industry                     | Sustainability                                  | Web of Science                             |                                            | X                                       |                             |                                  |                                              |
| Belaud et al.      | 2019 | Big data for agri-food 4.0: Application to sustainability management for by-products supply chain                               | Computers in Industry                           | Science direct<br>Scopus<br>Web of Science |                                            |                                         | X                           |                                  |                                              |
| Boccia et al.      | 2019 | Food waste and bio-economy: A scenario for the Italian tomato market                                                            | Journal of Cleaner Production                   | Science direct                             |                                            | X                                       |                             |                                  |                                              |
| Borrello et al.    | 2016 | The Seven Challenges for Transitioning into a Bio-based Circular Economy in the Agri-food Sector                                | Recent Patents on Food, Nutrition & Agriculture | Scopus                                     |                                            |                                         |                             | X                                |                                              |
| Coderoni et al.    | 2020 | Sustainable consumption in the circular economy. An analysis of consumers' purchase intentions for waste-to-value food          | Journal of Cleaner Production                   | Science direct                             |                                            |                                         |                             | X                                |                                              |

|                      |      |                                                                                                                                                                 |                                                  |                          |   |   |   |  |   |
|----------------------|------|-----------------------------------------------------------------------------------------------------------------------------------------------------------------|--------------------------------------------------|--------------------------|---|---|---|--|---|
| Corrado et al.       | 2017 | Modelling of food loss within life cycle assessment: From current practice towards a systematisation                                                            | Journal of Cleaner Production                    | Science direct           |   |   | X |  |   |
| Corrado et al.       | 2018 | Food waste accounting along global and European food supply chains: State of the art and outlook                                                                | Waste Management                                 | Scopus<br>Web of Science |   | X |   |  | X |
| Donner et al.        | 2020 | A new circular business model typology for creating value from agro waste                                                                                       | Science of the Total Environment                 | Science direct           | X |   |   |  |   |
| Dora et al.          | 2020 | A system-wide interdisciplinary conceptual framework for food loss and waste mitigation strategies in the supply chain                                          | Industrial Marketing Management                  | Science direct           |   | X |   |  |   |
| Esposito et al.      | 2020 | Towards Circular Economy in the Agri-Food Sector. A Systematic Literature Review                                                                                | Sustainability                                   | Scopus<br>Web of Science |   | X | X |  |   |
| Evans et al.         | 2017 | Business model innovation for sustainability: Towards a unified perspective for creation of sustainable business models                                         | Business Strategy and the Environment            | Web of Science           | X |   |   |  | X |
| Fava et al.          | 2020 | The Bioeconomy in Italy and the New National Strategy for a More Competitive and Sustainable Country                                                            | New Biotechnology                                | Science direct           |   |   |   |  | X |
| Franceschelli et al. | 2018 | Business model innovation for sustainability: a food start-up case study                                                                                        | British Food Journal                             | Scopus<br>Web of Science | X |   |   |  |   |
| Giroto et al.        | 2015 | Food waste generation and industrial uses: a review                                                                                                             | Waste management                                 | Science direct           |   | X |   |  |   |
| Kristensen et al.    | 2016 | Enabling sustainable agro-food futures: exploring fault lines and synergies between the integrated territorial paradigm, rural eco-economy and circular economy | Journal of Agricultural and Environmental Ethics | Web of Science           |   |   |   |  | X |
| Kyriakopoulos et al. | 2019 | Evaluating Circular Economy under a Multi-Parametric Approach: A Technological Review                                                                           | Sustainability                                   | Web of Science           |   | X |   |  |   |

|                    |      |                                                                                                                                                                                 |                                       |                                            |   |   |   |   |   |
|--------------------|------|---------------------------------------------------------------------------------------------------------------------------------------------------------------------------------|---------------------------------------|--------------------------------------------|---|---|---|---|---|
| Lainez et al.      | 2018 | Spanish strategy on bioeconomy: Towards a knowledge based sustainable innovation                                                                                                | New Biotechnology                     | Science direct<br>Web of Science           |   |   |   |   | X |
| McCarthy et al.    | 2019 | Circular agri-food approaches: will consumers buy novel products made from vegetable waste?                                                                                     | Rural Society                         | Web of Science                             |   |   |   | X |   |
| Muradin et al.     | 2018 | Evaluation of Eco-Efficiency of Two Alternative Agricultural Biogas Plants                                                                                                      | Applied Sciences                      | Web of Science                             |   |   | X |   |   |
| Muscio et al.      | 2020 | Are Agri-Food Systems Really Switching to a Circular Economy Model? Implications for European Research and Innovation Policy                                                    | Sustainability                        | Web of Science                             |   |   |   |   | X |
| Naziri et al.      | 2014 | Valorization of the major agrifood industrial by-products and waste from Central Macedonia (Greece) for the recovery of compounds for food applications                         | Food research international           | Science direct                             |   | X |   |   |   |
| Nosratabadi et al. | 2019 | Sustainable Business Models: A Review                                                                                                                                           | Sustainability                        | Web of Science                             | X |   |   |   |   |
| Pagotto et al.     | 2016 | Towards a circular economy in Australian agri-food industry: an application of input-output oriented approaches for analyzing resource efficiency and competitiveness potential | Journal of Industrial Ecology         | Web of Science                             |   |   | X |   |   |
| Principato et al.  | 2019 | Adopting the circular economy approach on food loss and waste: The case of Italian pasta production                                                                             | Resources, Conservation and Recycling | Science direct<br>Scopus<br>Web of Science |   | X |   |   |   |
| Sehnem et al.      | 2020 | Circular economy in the wine chain production: maturity, challenges, and lessons from an emerging economy perspective                                                           | Production planning & control         | Web of Science                             | X |   |   |   |   |
